# Supplementary material for: Psychometric properties of the PHQ-9 depression scale in people with multiple sclerosis: A systematic review
Source: PubMed Central journal article supplement (PMC6380554; doi:10.1371/journal.pone.0197943), 2019-02-19
Supplement: pone.0197943.s002.pdf [file pone.0197943.s002.pdf]

## **Psychometric properties of the PHQ-9 depression scale in people with multiple sclerosis: a systematic review**

**Sarah Patrick<sup>1</sup> & Peter Connick<sup>2</sup>**

1 – College of Medicine and Veterinary Medicine, University of Edinburgh, Edinburgh, UK.

2 – Centre for Clinical Brain Sciences, University of Edinburgh, Edinburgh, UK.

### **Background**

Multiple sclerosis (MS) affects over 2.5 M people globally. It is a chronic inflammatory and neurodegenerative disease of the central nervous system that commonly presents with sensory, motor, and cognitive impairments. The co-existence of depression in people with MS is increasingly recognised, with a lifetime prevalence >50% and a point prevalence of approximately 25%. Depression is a major determinant of quality of life in people with MS, and is often under-recognised in clinical practice.

A number of tools have been used to quantify the burden of affective symptoms in people with MS, including the Beck Depression Inventory (BDI-II), Hospital Anxiety and Depression Scale (HADS), and the nine-item Patient Health Questionnaire (PHQ-9). The PHQ-9 scale is of particular interest in this context because it is freely available and has been validated across a wide range of clinical populations. The PHQ-9 is a self-report version of the Primary Care Evaluation of Mental Disorders (PRIME-MD), developed in the mid-1990s by Pfizer Inc. It is a self-reported instrument for the evaluation of depressive symptoms over the preceding 2 weeks, and involves 9-items with four responses to indicate the frequency of symptom-experience.

There have been previous reviews of depression scoring tools in people with MS (e.g. a 2016 paper by Hind et al) but there lacks a focused review of the PHQ-9's performance in patients with MS. A more focused systematic review of the PHQ-9's performance in patients with multiple sclerosis is therefore due.

### **Objective**

The performance of the PHQ-9 will be evaluated through the following eight indicators: appropriateness, reliability, validity, responsiveness, precision, interpretability, acceptability, and feasibility (Fitzpatrick et al. Health Technology Assessment. 1998; 2[14]:1-74).

### **Searches**

Evidence will be gathered from the databases 'PubMed', 'Medline' and 'ISI Web of Science'. There will also be hand-searching of references from eligible sources. The full search strategy is recorded on the PROSPERO International prospective register of systematic reviews site (<https://www.crd.york.ac.uk/PROSPERO>).

## **Eligibility Criteria**

After gathering the evidence, the following eligibility criteria will be applied to the results: The sources must be primary literature, must be in the English language, must be peer-reviewed, and the primary aim of each study must be to evaluate the performance of the PHQ-9 in people with MS (including if the study also evaluates other depression inventories or other conditions). There will be no date restriction on eligibility.

Screening of primary database search: The abstracts of all identified studies will be screened against the eligibility criteria. If no eligibility criteria are breached, the full manuscript will be assessed for eligibility.

## **Condition or domain being studied**

Depression measurement in patients with Multiple Sclerosis (MS)

## **Participants/ population**

The target group in this systematic review are people with MS (any type). Studies with comparison groups (e.g., other conditions – physical or psychological, health subjects) will also be included in the review.

## **Assessment of Risk of Bias and Data Extraction**

A study quality assessment tool will be developed based on STROBE guidelines to evaluate the risk of bias in individual studies.

Initial screening of abstracts will be performed by a single author (SP). Full articles will then be retrieved and eligibility assessment performed in a standardized manner, with a final decision over study inclusion taken in consensus with a second reviewer (PC). A standardised data extraction form will be used, which includes details about the study (authors, year, country), the sample (size, method of recruitment)

## **Data Synthesis**

The findings will be combined narratively.

## **Dissemination**

A paper will be submitted to a scientific journal for publication.

## **Implications**

This study will identify any gaps in the knowledge base around the psychometric performance of the PHQ-9 in MS. This will guide future research prior to wider implementation.

---

**Online access:** Details of the protocol for this systematic review were prospectively registered on PROSPERO.

Peter Connick, Sarah Patrick. Psychometric properties of the PHQ-9 depression scale in people with multiple sclerosis: a systematic review. PROSPERO 2017 CRD42017067814

Available from:

[http://www.crd.york.ac.uk/PROSPERO/display\\_record.php?ID=CRD42017067814](http://www.crd.york.ac.uk/PROSPERO/display_record.php?ID=CRD42017067814)
